# Supplementary material for: Intraspecific ITS Variability in the Kingdom Fungi as Expressed in the International Sequence Databases and Its Implications for Molecular Species Identification
Source: PubMed Central journal article supplement (PMC2614188; doi:10.4137/ebo.s653), 2008-05-26

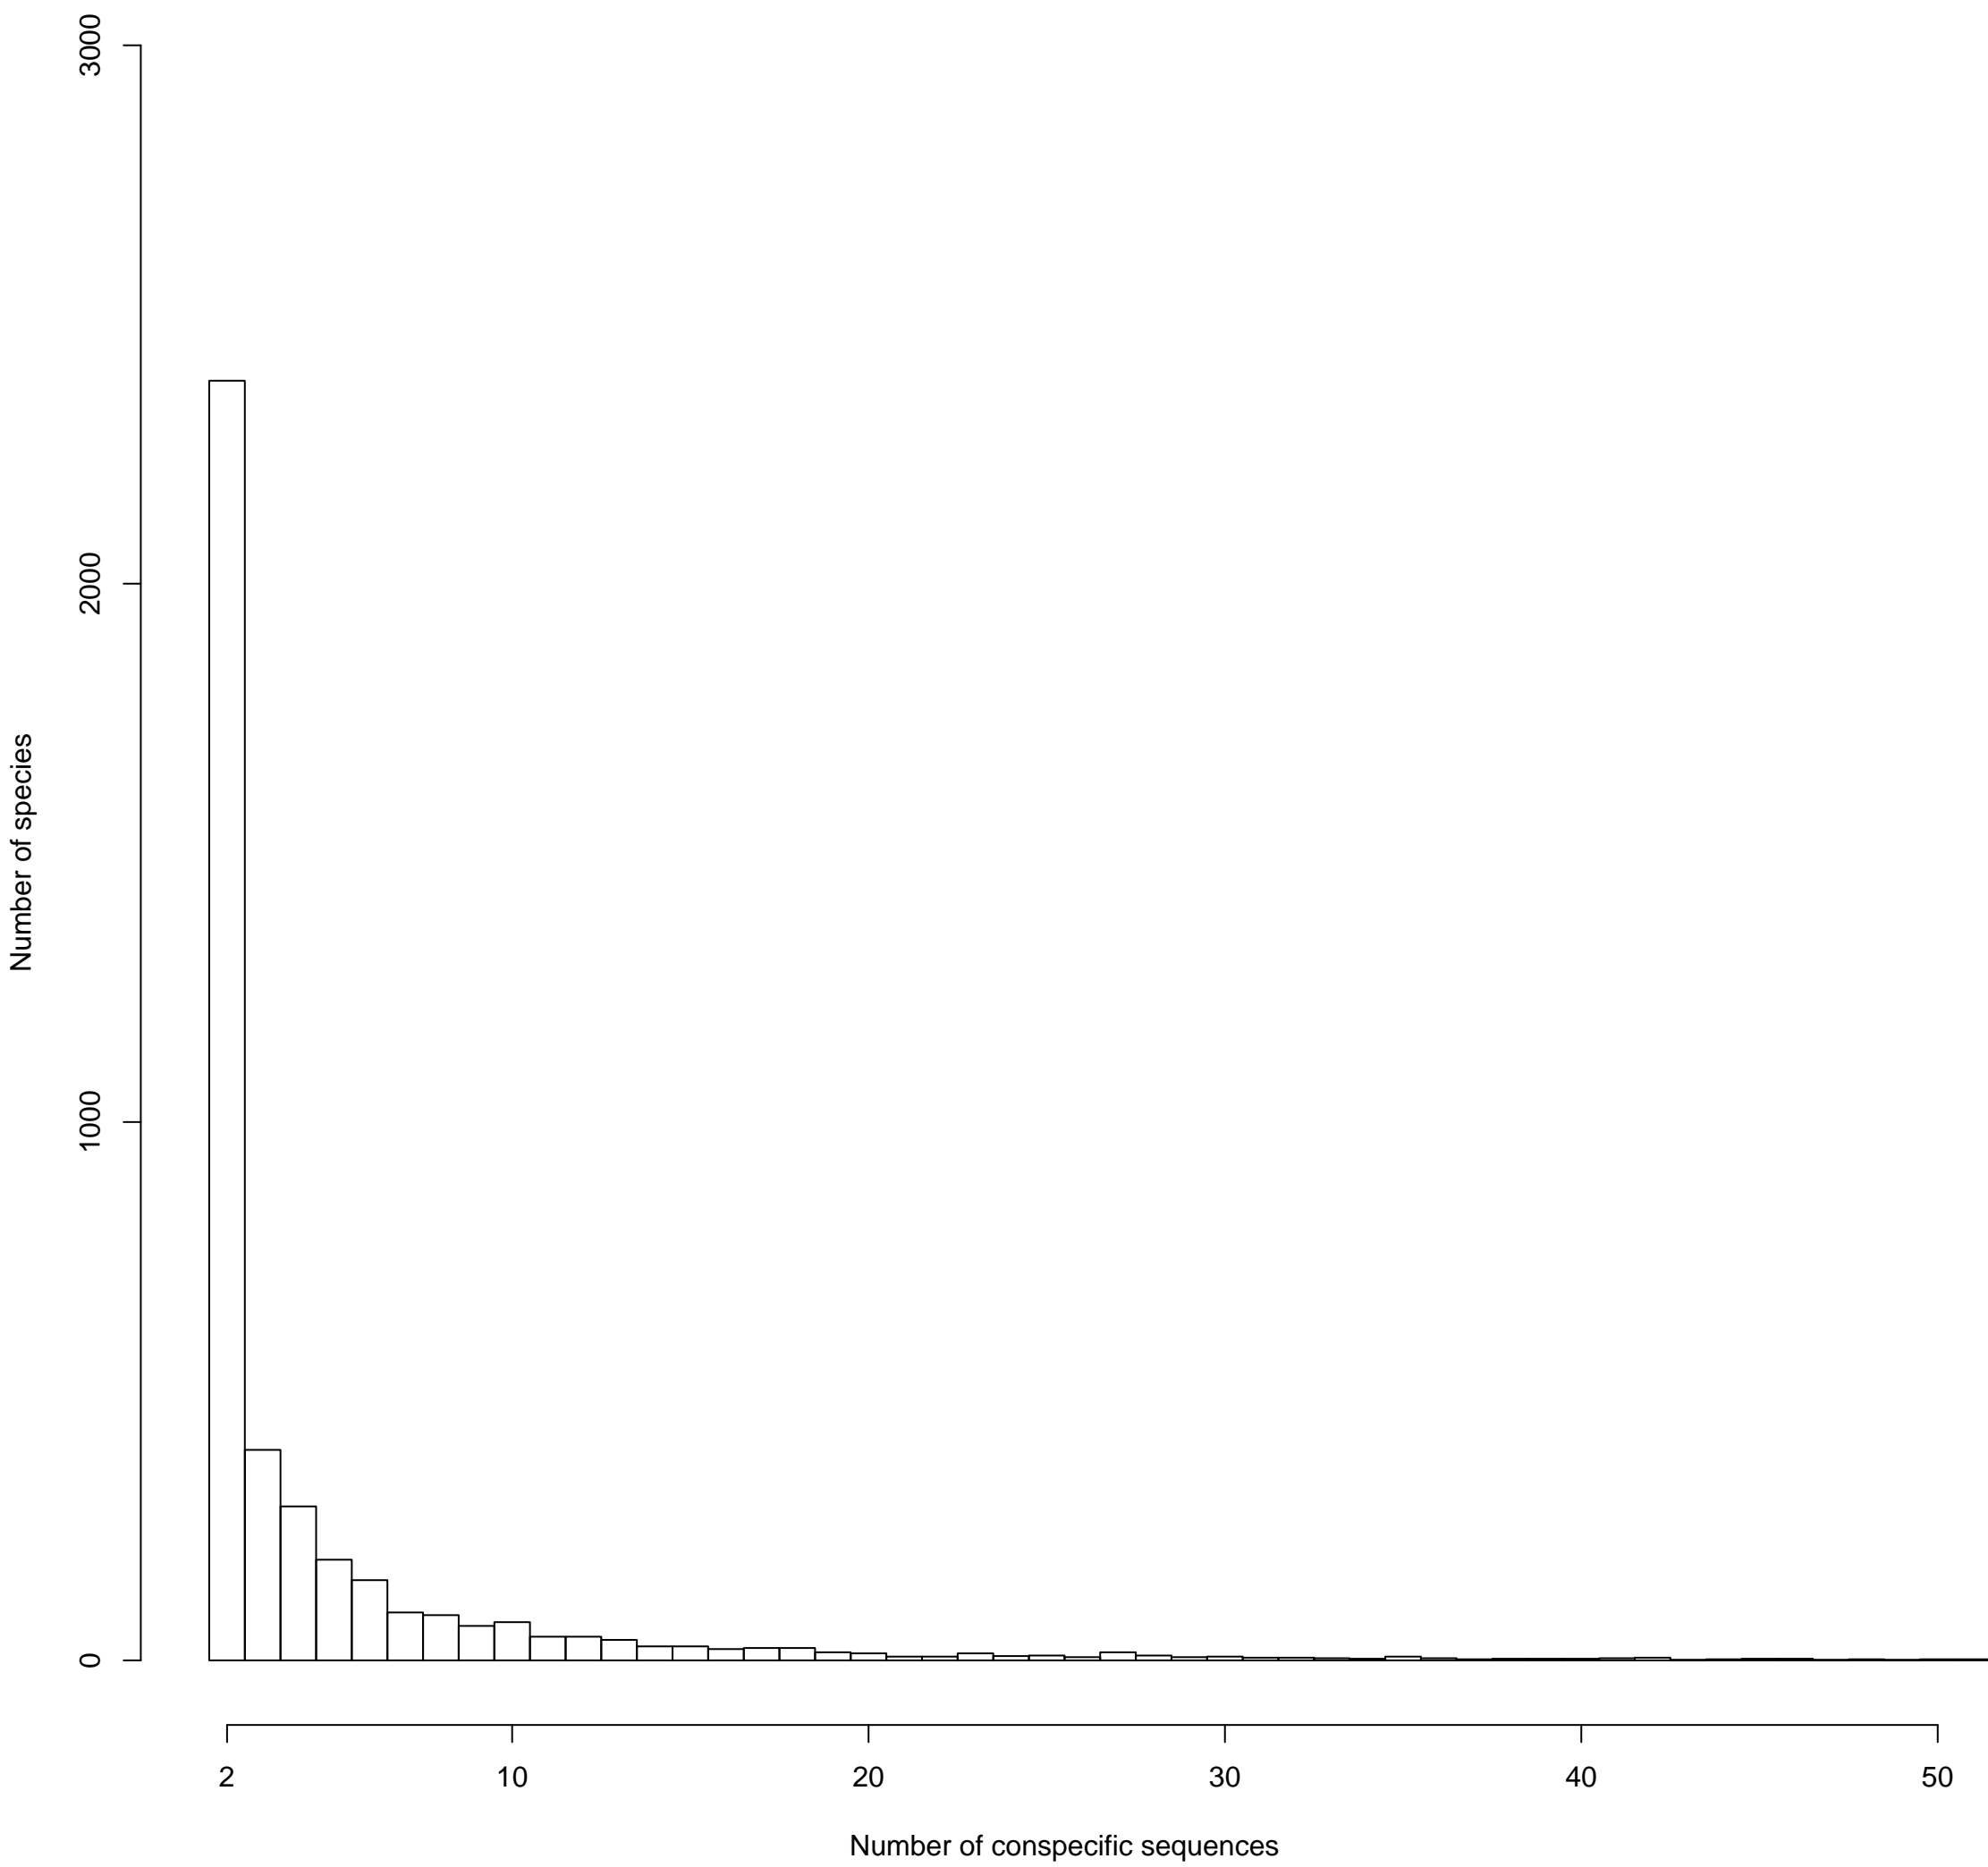

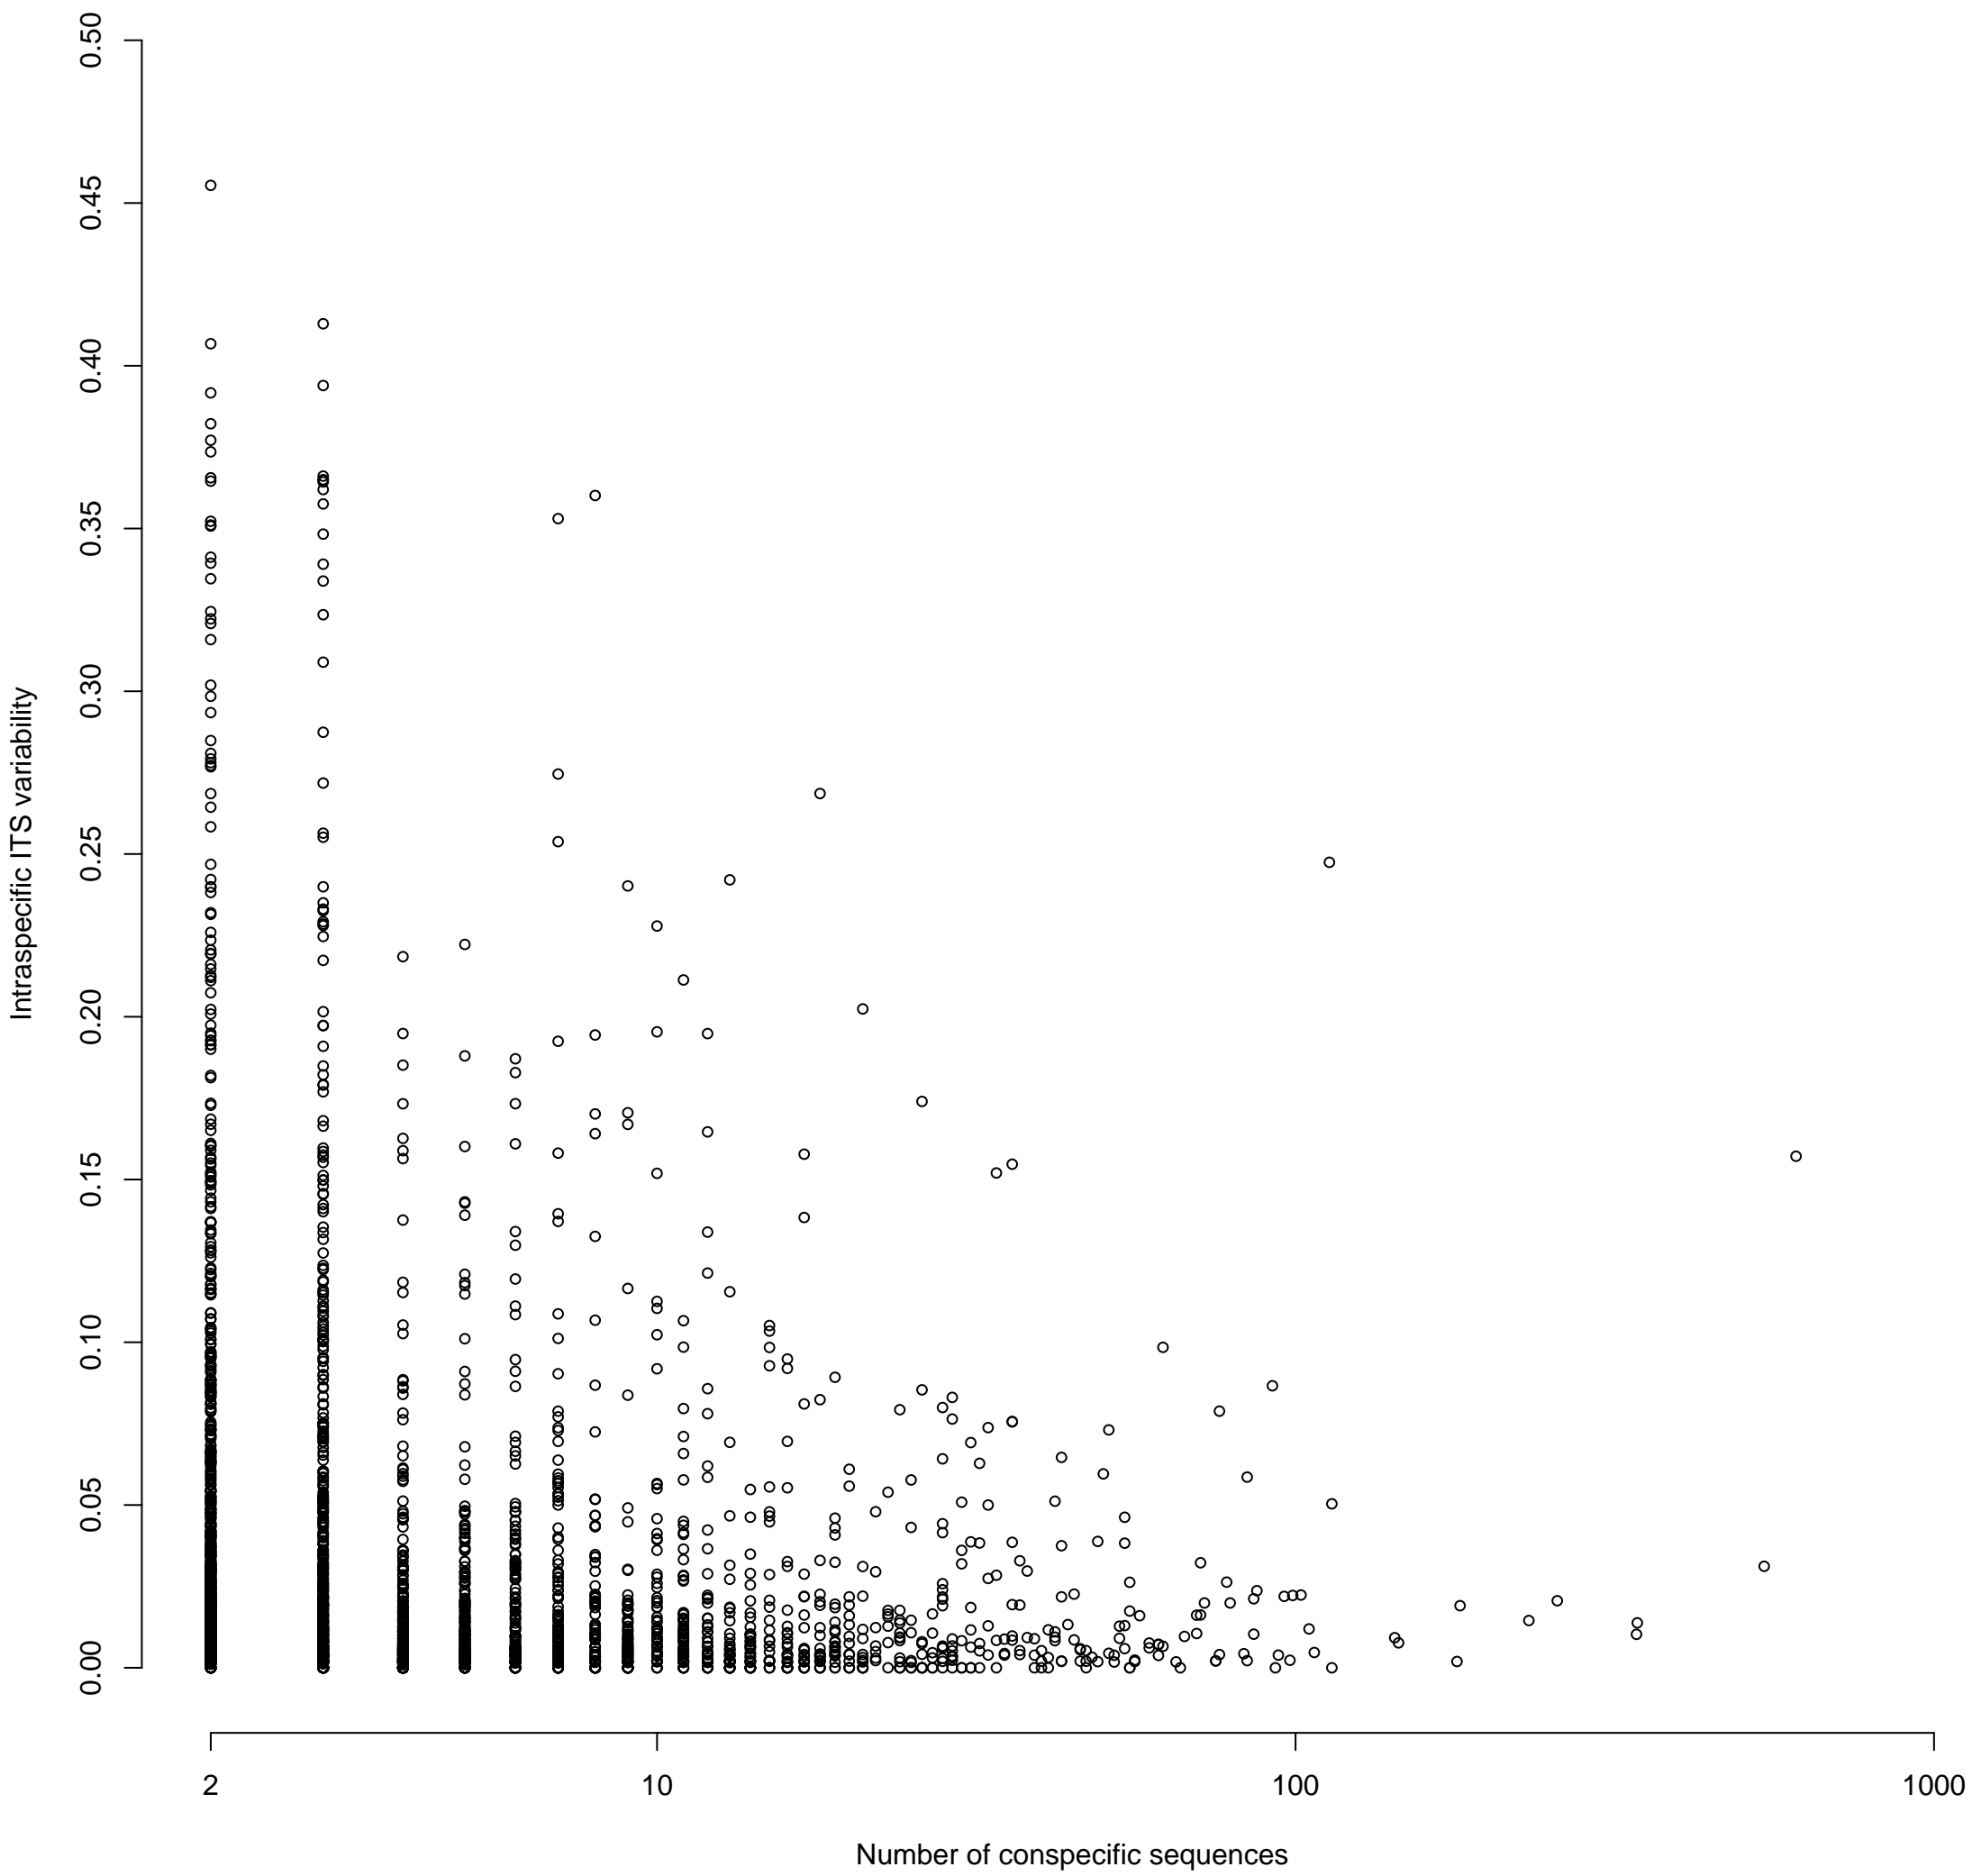

ITS2 variability (logarithmic scale)

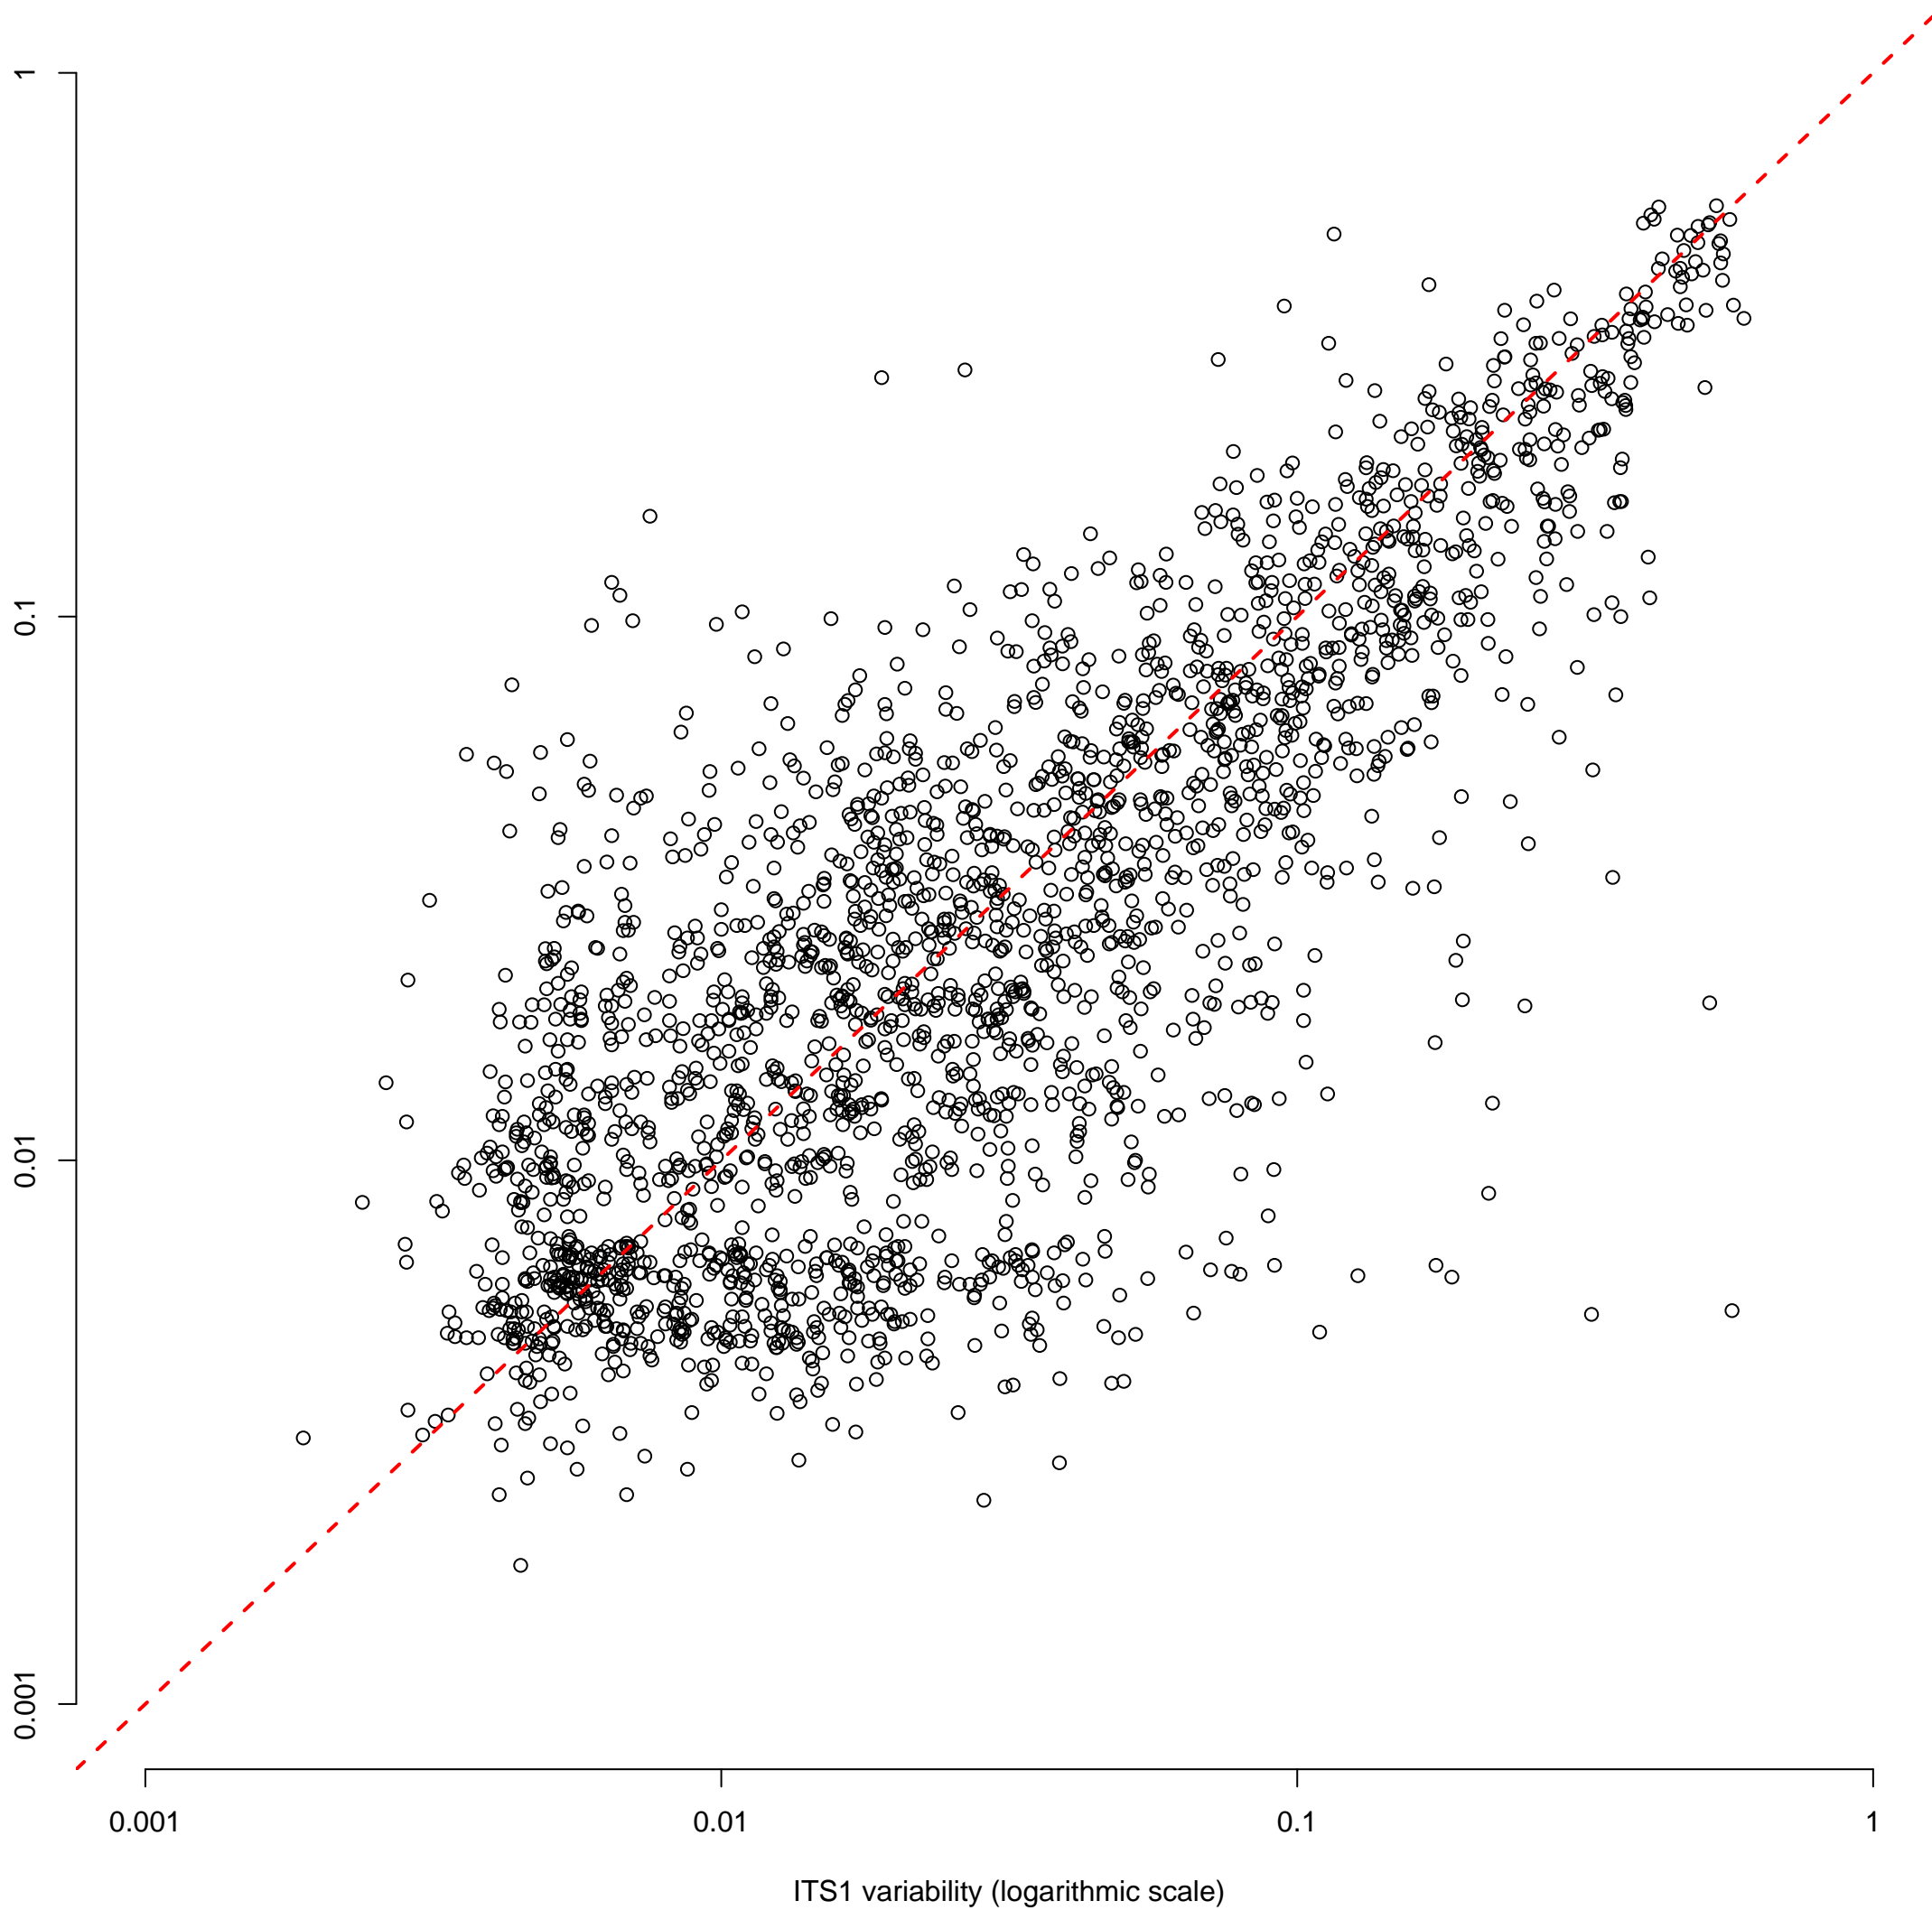

0.001

0.01

0.1

1

0.001

0.01

0.1

1

ITS1 variability (logarithmic scale)

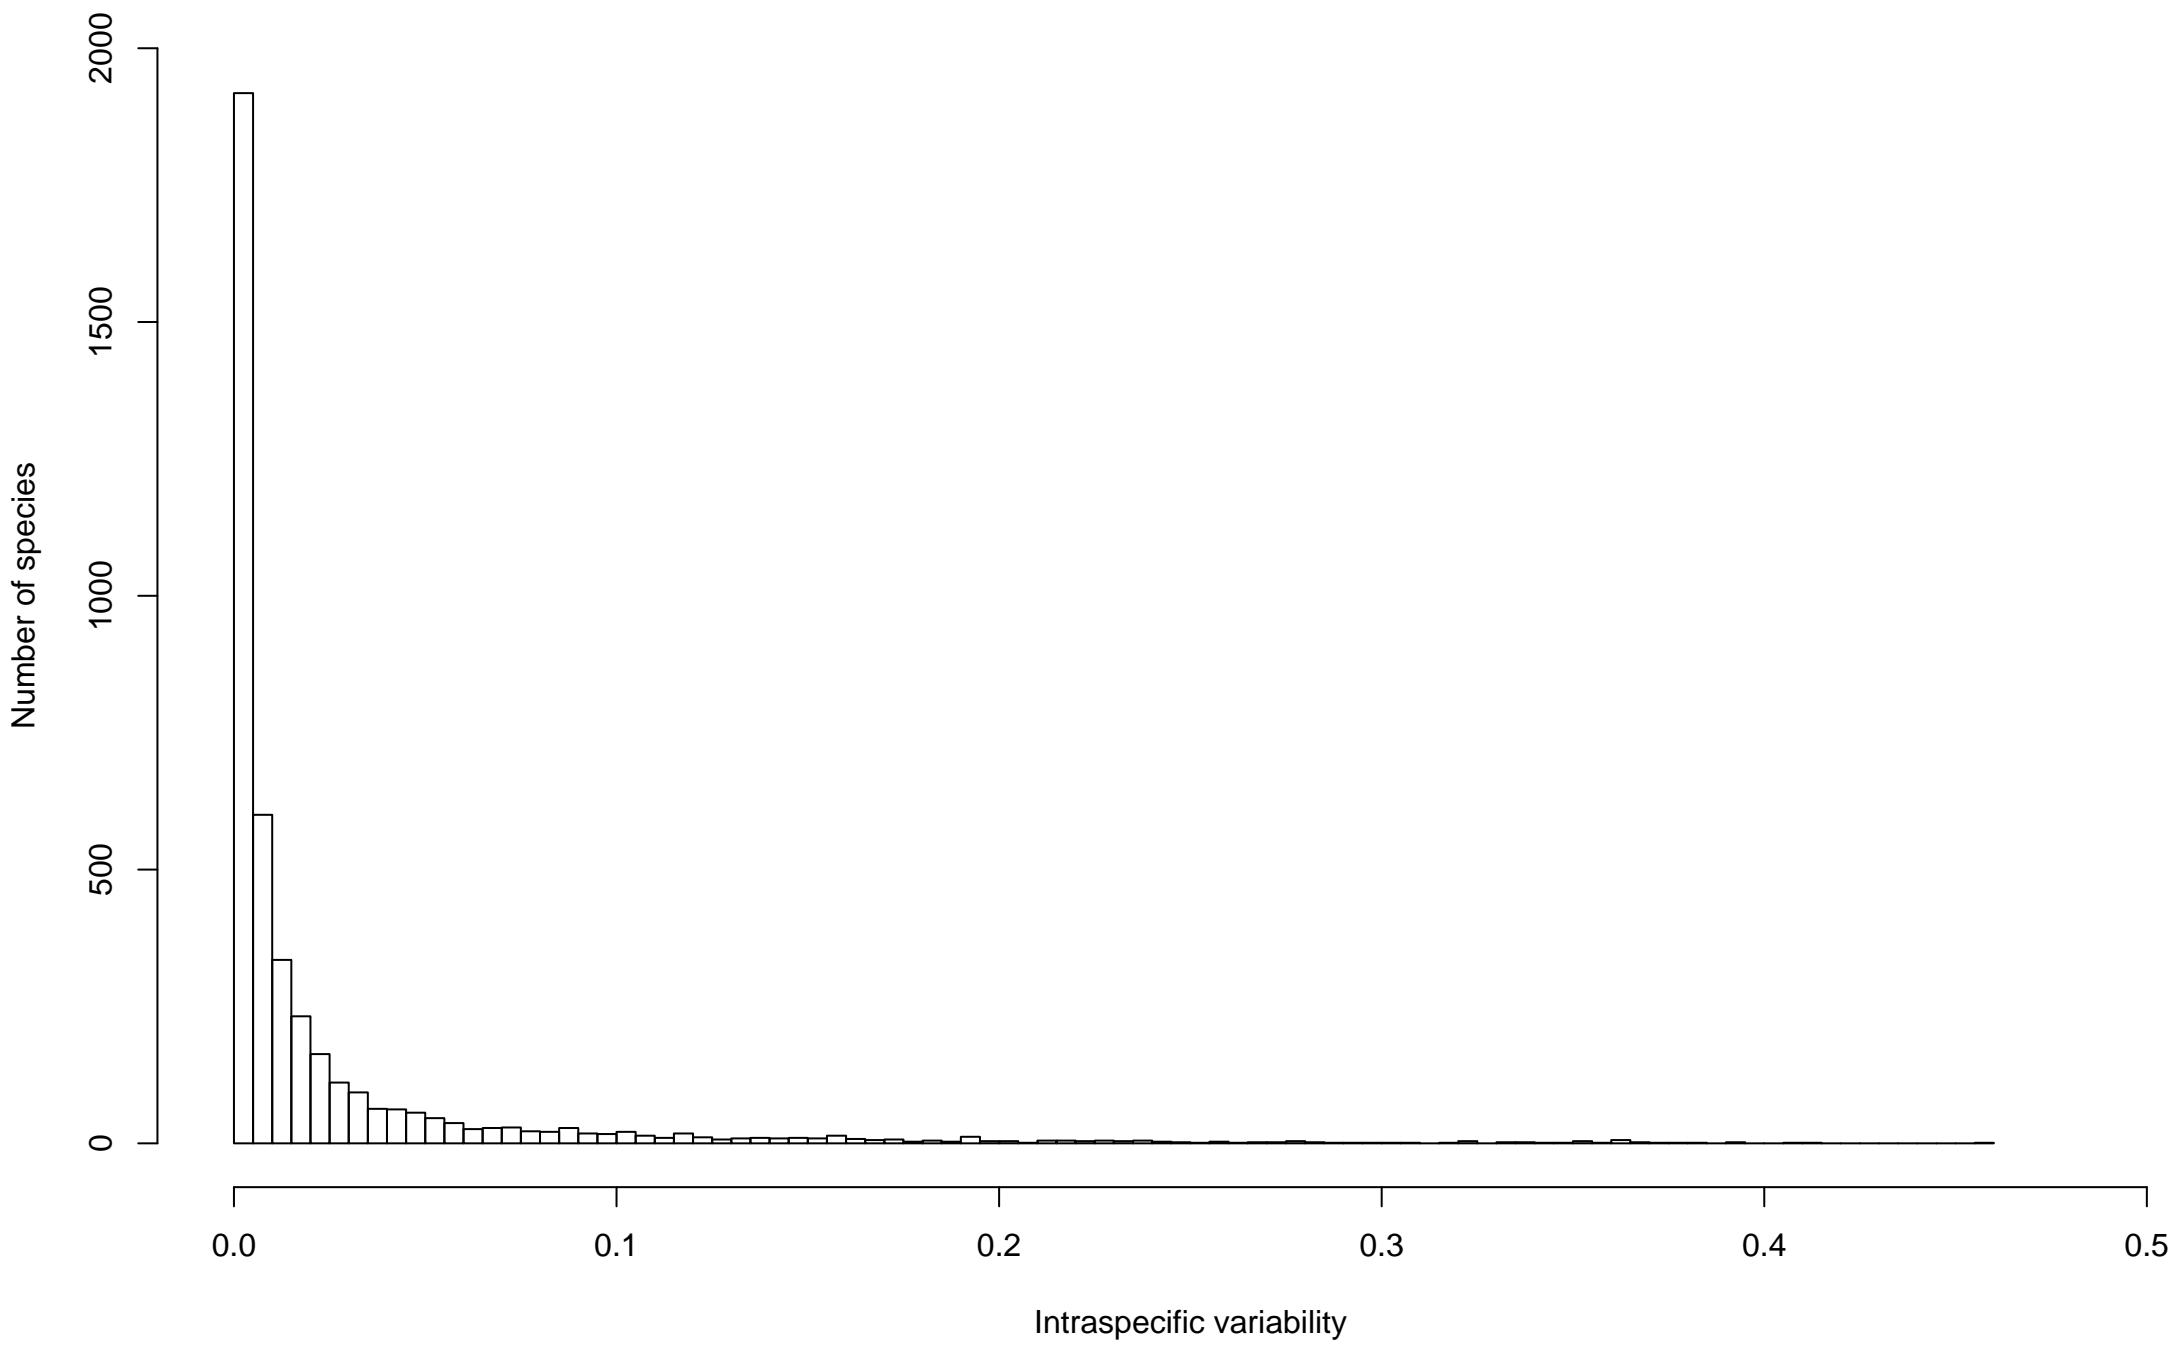

Supplement: ebo-4-193-s2.pdf [file ebo-4-193-s2.pdf]
